# Supplementary material for: CTAB Protocol for Obtaining High-Quality Total RNA from Hibiscus rosa-sinensis and Other Related Plants of the Family Malvaceae
Source: PubMed Central journal article supplement — ACS Omega. 2024 Apr 22;9(18):20359–67. doi: 10.1021/acsomega.4c00877 (PMC11080010; doi:10.1021/acsomega.4c00877), 2024-04-22
Supplement: ao4c00877_si_001.pdf [file ao4c00877_si_001.pdf]

Table S1 ; Concentrations and spectroscopic analysis for RNA extracted using different Extraction Buffers

| S.No | Type Extraction Buffer (EB) | Concentration(ng/μl) |         |         |            |            | OD260/280 |         |         |          |            | OD260/230 |         |         |            |            |
|------|-----------------------------|----------------------|---------|---------|------------|------------|-----------|---------|---------|----------|------------|-----------|---------|---------|------------|------------|
|      |                             | Trial 1              | Trial 2 | Trial 3 | Average    | SD         | Trial 1   | Trial 2 | Trial 3 | Average  | SD         | Trial 1   | Trial 2 | Trial 3 | Average    | SD         |
| 1    | EBI                         | 133                  | 138     | 124.3   | 131.766667 | 5.66058497 | 2.2       | 2.23    | 2.18    | 2.203333 | 0.02054805 | 2.1       | 1.9     | 2.08    | 2.02666667 | 0.08993825 |
| 2    | EBII                        | 207                  | 200.5   | 211     | 206.16667  | 4.3269183  | 2.13      | 2.1     | 2.05    | 2.09333  | 0.0329983  | 1.9       | 1.88    | 1.82    | 1.8666667  | 0.0339935  |
| 3    | EBIII                       | 0.7                  | 0.8     | 0.6     | 0.7        | 0.08164966 | 1.06      | 1.25    | 1.3     | 1.203333 | 0.10338708 | 0.08      | 0.1     | 0.09    | 0.09       | 0.00816497 |
| 4    | EBIV                        | 4                    | 4.5     | 3.5     | 4          | 0.40824829 | 1.14      | 1.2     | 1.2     | 1.18     | 0.02828427 | 0.16      | 0.14    | 0.21    | 0.17       | 0.0294392  |
| 5    | EBV                         | 129                  | 123.4   | 132.6   | 128.333333 | 3.78535188 | 2.13      | 2.07    | 2       | 2.066667 | 0.05312459 | 1.57      | 1.66    | 1.69    | 1.64       | 0.0509902  |

Table S2; Concentrations and spectroscopic analysis for RNA extracted using different salt concentrations of EBII

| S.No. | Extraction Buffer made with different concentrations of KCl (Molar) | Concentration(ng/ $\mu$ l) |         |         |           |            | OD260/280 |         |         |            |           | OD260/230 |         |         |            |            |
|-------|---------------------------------------------------------------------|----------------------------|---------|---------|-----------|------------|-----------|---------|---------|------------|-----------|-----------|---------|---------|------------|------------|
|       |                                                                     | Trial 1                    | Trial 2 | Trial 3 | Average   | SD         | Trial 1   | Trial 2 | Trial 3 | Average    | SD        | Trial 1   | Trial 2 | Trial 3 | Average    | SD         |
| 1     | 0                                                                   | 23                         | 18.9    | 16.3    | 19.4      | 2.75801861 | 1.89      | 1.96    | 1.98    | 1.94333333 | 0.0385861 | 0.18      | 0.17    | 0.19    | 0.18       | 0.00816497 |
| 2     | 0.5                                                                 | 22.7                       | 18.7    | 28.8    | 23.4      | 4.15291063 | 1.72      | 1.84    | 1.69    | 1.75       | 0.0648074 | 0.12      | 0.14    | 0.19    | 0.15       | 0.0294392  |
| 3     | 1                                                                   | 257.9                      | 249.9   | 256     | 254.6     | 3.4127213  | 1.99      | 2.05    | 1.9     | 1.98       | 0.0616441 | 0.99      | 0.9     | 1.02    | 0.97       | 0.0509902  |
| 4     | 1.5                                                                 | 272                        | 271.4   | 278     | 273.8     | 2.97993289 | 2.17      | 2.1     | 2.09    | 2.12       | 0.0355903 | 1.5       | 1.48    | 1.55    | 1.51       | 0.0294392  |
| 5     | 2                                                                   | 242.6                      | 236.2   | 246.2   | 241.66667 | 4.1354833  | 2.1       | 2.16    | 2.08    | 2.11333333 | 0.033993  | 1.91      | 1.98    | 2.01    | 1.96666667 | 0.04189935 |

Table S3; Concentrations and spectroscopic analysis for RNA extracted using different time spans for precipitation at the last step with LiCl (7.5M)

| S.No. | Time of Precipitation with LiCl (7.5M) | Concentration(ng/μl) |             |             |             |                | OD260/280   |             |            |             |                | OD260/230   |             |             |             |                |
|-------|----------------------------------------|----------------------|-------------|-------------|-------------|----------------|-------------|-------------|------------|-------------|----------------|-------------|-------------|-------------|-------------|----------------|
|       |                                        | Trial 1              | Trial 2     | Trial 3     | Average     | SD             | Trial 1     | Trial 2     | Trial 3    | Average     | SD             | Trial 1     | Trial 2     | Trial 3     | Average     | SD             |
| 1     | 5 min.                                 | 10.1                 | 15.2        | 8.3         | 11.2        | 2.922328       | 1.87        | 1.77        | 1.73       | 1.79        | 0.058878       | 0.24        | 0.25        | 0.2         | 0.23        | 0.021602       |
| 2     | 10 min.                                | 27.3                 | 30.5        | 21.4        | 26.4        | 3.769173       | 2.01        | 1.92        | 1.98       | 1.97        | 0.037417       | 0.44        | 0.42        | 0.52        | 0.46        | 0.043205       |
| 3     | <b>15 min.</b>                         | <b>89.6</b>          | <b>93.3</b> | <b>88.9</b> | <b>90.6</b> | <b>1.93046</b> | <b>2.11</b> | <b>2.02</b> | <b>2.2</b> | <b>2.11</b> | <b>0.07348</b> | <b>1.09</b> | <b>1.06</b> | <b>1.18</b> | <b>1.11</b> | <b>0.05099</b> |
| 4     | 20 min.                                | 69.5                 | 72.1        | 64.2        | 68.6        | 3.287349       | 1.97        | 2.01        | 1.93       | 1.97        | 0.03266        | 0.65        | 0.68        | 0.74        | 0.69        | 0.037417       |
| 5     | 25 min.                                | 45.3                 | 41.2        | 48.2        | 44.9        | 2.871701       | 2.15        | 2.09        | 2.09       | 2.11        | 0.028284       | 1.09        | 0.99        | 0.98        | 1.02        | 0.049666       |
| 6     | 30 min.                                | 15                   | 16.8        | 20.1        | 17.3        | 2.111871       | 2.01        | 1.95        | 1.98       | 1.98        | 0.024495       | 0.25        | 0.3         | 0.29        | 0.28        | 0.021602       |

Table S4; Concentrations and Spectroscopic analysis for RNA extracted from different plants

| S.No | Plant Material (Malvaceae family) | Concentration(ng/μl) |         |         |          |          | OD260/280 |         |         |          |            | OD260/230 |         |         |         |            |
|------|-----------------------------------|----------------------|---------|---------|----------|----------|-----------|---------|---------|----------|------------|-----------|---------|---------|---------|------------|
|      |                                   | Trial 1              | Trial 2 | Trial 3 | Average  | SD       | Trial 1   | Trial 2 | Trial 3 | Average  | SD         | Trial 1   | Trial 2 | Trial 3 | Average | SD         |
| 1    | <i>Hibiscus rosa-sinensis</i>     | 180                  | 188.6   | 185.8   | 184.8    | 3.581434 | 2.17      | 2.19    | 2.12    | 2.16     | 0.0294392  | 1.33      | 1.43    | 1.38    | 1.37    | 0.05354126 |
| 2    | <i>Althea rosea</i>               | 195                  | 188     | 196     | 193      | 3.559026 | 2.22      | 2.21    | 2.22    | 2.21     | 0.00816497 | 1.88      | 1.99    | 1.95    | 1.91    | 0.0294392  |
| 3    | <i>Malvaviscus arboreus</i>       | 168                  | 162     | 172     | 167.3333 | 4.109609 | 2.03      | 2.07    | 2.11    | 2.066667 | 0.02867442 | 1.28      | 1.31    | 1.25    | 1.28    | 0.0244949  |
| 4    | <i>Abutilon indicum</i>           | 107.7                | 112     | 110     | 109.9    | 1.756891 | 2.17      | 2.09    | 2.11    | 2.12     | 0.03559026 | 1.73      | 1.88    | 1.84    | 1.79    | 0.04546061 |
| 5    | <i>Sida acuta</i>                 | 62.4                 | 69.3    | 64.5    | 65.4     | 2.887906 | 2         | 2.06    | 2.11    | 2.053333 | 0.04109609 | 1.02      | 1       | 1.01    | 1.01    | 0.00816497 |

Table S5; Spectroscopic and concentration comparison of RNA extracted using the modified protocol with the standard protocol

**A**

| S.No. | Plant material                | Concentration (ng/μl) |         |         |             |           |         |         |         |             |             |
|-------|-------------------------------|-----------------------|---------|---------|-------------|-----------|---------|---------|---------|-------------|-------------|
|       |                               | EBI                   |         |         |             |           | EBII    |         |         |             |             |
|       |                               | Trial 1               | Trial 2 | Trial 3 | Average     | SD        | Trial 1 | Trial 2 | Trial 3 | Average     | SD          |
| 1     | <i>Hibiscus rosa-sinensis</i> | 60.6                  | 65.1    | 58.58   | 61.42666667 | 2.7252074 | 136     | 138     | 131     | 135         | 2.867441756 |
| 2     | <i>Altheae rosea</i>          | 56.1                  | 66      | 63      | 61.7        | 4.1448764 | 101     | 104.4   | 109     | 104.8       | 2.080598205 |
| 3     | <i>Malvaviscus arboreus</i>   | 91.8                  | 84.2    | 87.7    | 87.9        | 3.1059083 | 131     | 137.7   | 134     | 134.2333333 | 1.69188331  |
| 4     | <i>Abutilon indicum</i>       | 38                    | 42.1    | 42      | 40.7        | 1.9096247 | 101.2   | 110     | 106.2   | 105.8       | 1.892675942 |
| 5     | <i>Sida acuta</i>             | 50.21                 | 54      | 52.4    | 52.20333333 | 1.5534978 | 73.3    | 76.4    | 70.2    | 73.3        | 2.531139401 |

**B**

| S.No. | Plant material                | OD260/280 |         |         |            |             |         |         |         |            |             |
|-------|-------------------------------|-----------|---------|---------|------------|-------------|---------|---------|---------|------------|-------------|
|       |                               | EBI       |         |         |            |             | EBII    |         |         |            |             |
|       |                               | Trial 1   | Trial 2 | Trial 3 | Average    | SD          | Trial 1 | Trial 2 | Trial 3 | Average    | SD          |
| 1     | <i>Hibiscus rosa-sinensis</i> | 2.06      | 2.07    | 2.05    | 2.06       | 0.008164966 | 2.08    | 2.1     | 2.06    | 2.08       | 0.016329932 |
| 2     | <i>Altheae rosea</i>          | 2.13      | 2.11    | 2.16    | 2.13333333 | 0.020427529 | 2.19    | 2.2     | 2.18    | 2.19       | 0.008164966 |
| 3     | <i>Malvaviscus arboreus</i>   | 2.02      | 2.06    | 2.05    | 2.04333333 | 0.006849349 | 2.07    | 2.14    | 2.18    | 2.13       | 0.045460606 |
| 4     | <i>Abutilon indicum</i>       | 2.02      | 2.05    | 2.04    | 2.03666667 | 0.005665577 | 2.22    | 2.21    | 2.23    | 2.22       | 0.008164966 |
| 5     | <i>Sida acuta</i>             | 2.15      | 2.16    | 2.12    | 2.14333333 | 0.016405359 | 2.04    | 2.08    | 2.01    | 2.04333333 | 0.028674418 |

C

| S.No. | Plant material                | OD260/230 |         |         |            |          |         |         |         |            |             |
|-------|-------------------------------|-----------|---------|---------|------------|----------|---------|---------|---------|------------|-------------|
|       |                               | EBI       |         |         |            |          | EBII    |         |         |            |             |
|       |                               | Trial 1   | Trial 2 | Trial 3 | Average    | SD       | Trial 1 | Trial 2 | Trial 3 | Average    | SD          |
| 1     | <i>Hibiscus rosa-sinensis</i> | 0.72      | 0.667   | 0.78    | 0.72233333 | 0.046162 | 1.16    | 1.2     | 1.2     | 1.18666667 | 0.018856181 |
| 2     | <i>Altheae rosea</i>          | 1.14      | 1.12    | 1.19    | 1.15       | 0.029439 | 1.7     | 1.76    | 1.82    | 1.76       | 0.048989795 |
| 3     | <i>Malvaviscus arboreus</i>   | 0.7       | 0.78    | 0.8     | 0.76       | 0.043205 | 1.52    | 1.67    | 1.65    | 1.61333333 | 0.066499791 |
| 4     | <i>Abutilon indicum</i>       | 1.17      | 1.26    | 1.2     | 1.21       | 0.037417 | 1.94    | 1.86    | 1.96    | 1.92       | 0.043204938 |
| 5     | <i>Sida acuta</i>             | 1.01      | 1.09    | 0.94    | 1.01333333 | 0.061242 | 1       | 1.02    | 1       | 1.00666667 | 0.00942809  |

Table S6; pH comparison when Malvaceae family plants crushed in buffers EBI and EBII

| S.No. | Plant Material                | pH when crushed in EBI |         |         |             |             | pH when crushed in EBII |         |         |             |             |
|-------|-------------------------------|------------------------|---------|---------|-------------|-------------|-------------------------|---------|---------|-------------|-------------|
|       |                               | Trial 1                | Trial 2 | Trial 3 | Average     | SD          | Trial 1                 | Trial 2 | Trial 3 | Average     | SD          |
| 1     | <i>Hibiscus rosa-sinensis</i> | 7.33                   | 7.23    | 7.3     | 7.286666667 | 0.04189935  | 7.91                    | 7.92    | 7.93    | 7.92        | 0.008164966 |
| 2     | <i>Althea rosea</i>           | 7.42                   | 7.35    | 7.39    | 7.386666667 | 0.028674418 | 7.9                     | 7.9     | 7.89    | 7.896666667 | 0.004714045 |
| 3     | <i>Malvaviscus arboreus</i>   | 7.04                   | 7.06    | 7.08    | 7.06        | 0.016329932 | 7.78                    | 7.75    | 7.77    | 7.766666667 | 0.012472191 |
| 4     | <i>Abutilon indicum</i>       | 7.1                    | 7.05    | 7.09    | 7.08        | 0.021602469 | 7.66                    | 7.67    | 7.68    | 7.67        | 0.008164966 |
| 5     | <i>Sida acuta</i>             | 7.33                   | 7.29    | 7.31    | 7.31        | 0.016329932 | 7.77                    | 7.77    | 7.78    | 7.773333333 | 0.004714045 |

Table S7; Viscosity comparison when Malvaceae family plants crushed in buffers EBI and EBII

| S.No. | Plant Material                | Viscosity when crushed in EBI (Pa·s) |         |         |             |             | Viscosity when crushed in EBII (Pa·s) |         |         |             |             |
|-------|-------------------------------|--------------------------------------|---------|---------|-------------|-------------|---------------------------------------|---------|---------|-------------|-------------|
|       |                               | Trial 1                              | Trial 2 | Trial 3 | Average     | SD          | Trial 1                               | Trial 2 | Trial 3 | Average     | SD          |
| 1     | <i>Hibiscus rosa-sinensis</i> | 0.421                                | 0.447   | 0.448   | 0.438666667 | 0.012498889 | 0.0168                                | 0.0168  | 0.0167  | 0.016766667 | 4.71405E-05 |
| 2     | <i>Althea rosea</i>           | 1.38                                 | 1.35    | 1.14    | 1.29        | 0.106770783 | 0.378                                 | 0.354   | 0.354   | 0.362       | 0.011313708 |
| 3     | <i>Malvaviscus arboreus</i>   | 1.55                                 | 1.39    | 1.46    | 1.466666667 | 0.065489609 | 0.113                                 | 0.109   | 0.103   | 0.108333333 | 0.004109609 |
| 4     | <i>Abutilon indicum</i>       | 0.07444                              | 0.0747  | 0.0729  | 0.074013333 | 0.000794369 | 0.00772                               | 0.00744 | 0.0075  | 0.007553333 | 0.00012037  |
| 5     | <i>Sida acuta</i>             | 3.17                                 | 3.25    | 3.1     | 3.173333333 | 0.061282588 | 0.105                                 | 0.101   | 0.103   | 0.103       | 0.001632993 |
